# Supplementary material for: Immune gene variation associated with chromosome-scale differences among individual zebrafish genomes
Source: Springer Nature journal article supplement (doi:10.1038/s41598-023-34467-3), 2023-05-13
Supplement: MOESM1 [file 41598_2023_34467_MOESM1_ESM.pdf › 41598_2023_34467_MOESM1_ESM.pdf]

## **Supplemental file for:**

### **Immune gene variation associated with chromosome-scale differences among individual zebrafish genomes**

Sean C. McConnell, Kyle M. Hernandez, Jorge Andrade, and Jill L.O. de Jong

#### **Table of Contents for Supplementary Materials**

##### **Page**

|    |                                                                                                                                                                                                               |
|----|---------------------------------------------------------------------------------------------------------------------------------------------------------------------------------------------------------------|
| 1  | Figure S1. Flowchart of steps from raw sequencing data to variant detection and annotation.                                                                                                                   |
| 2  | Figure S2. Examples of genes with zero coverage regions (ZCRs) demonstrating distinct haplotypes                                                                                                              |
| 3  | Table S1. List of filters applied to zebrafish raw variants to enrich for higher confidence variants, applied at the locus level.                                                                             |
| 4  | Table S2. Number of known (Ensembl dbSNP 142), novel, and combined (all) variants remaining per genome, after filtering for higher confidence variants.                                                       |
| 5  | Table S3. Ratios of heterozygous (Het.) to homozygous (Hom.) variants for known (Ensembl dbSNP 142), novel, and combined (all) variants remaining per genome, after filtering for higher confidence variants. |
| 6  | Table S5. BUSCO analysis of genomic assemblies.                                                                                                                                                               |
| 7  | Table S6. Overview of assembly metrics.                                                                                                                                                                       |
| 8  | Table S7. Genomic scaffolds associated with 521 zebrafish chromosome 8.                                                                                                                                       |
| 9  | Table S8. Nomenclature and expression for zebrafish MHC class II genes.                                                                                                                                       |
| 10 | Table S9. Lists of Zebrafish and Human MHC genes, and Human NLR genes.                                                                                                                                        |
| 13 | Table S10. Summary of ZCR regions and number of genes found overlapping with ZCRs for the zebrafish and human genomes.                                                                                        |

##### **Separate Excel files**

Table S4. (Table S4.xlsx) Lists of zebrafish and human genes associated with positive selection ( $dN/dS$  ratio  $>1$ ), and genes found to be overlapping with zero coverage regions (ZCRs)

Table S11. (Table S11.xlsx) Summary of MHC, NLR, and all genes found overlapping with ZCRs for the zebrafish and human genomes.

**Figure S1**

**Flowchart of steps from raw sequencing data to variant detection and annotation.**

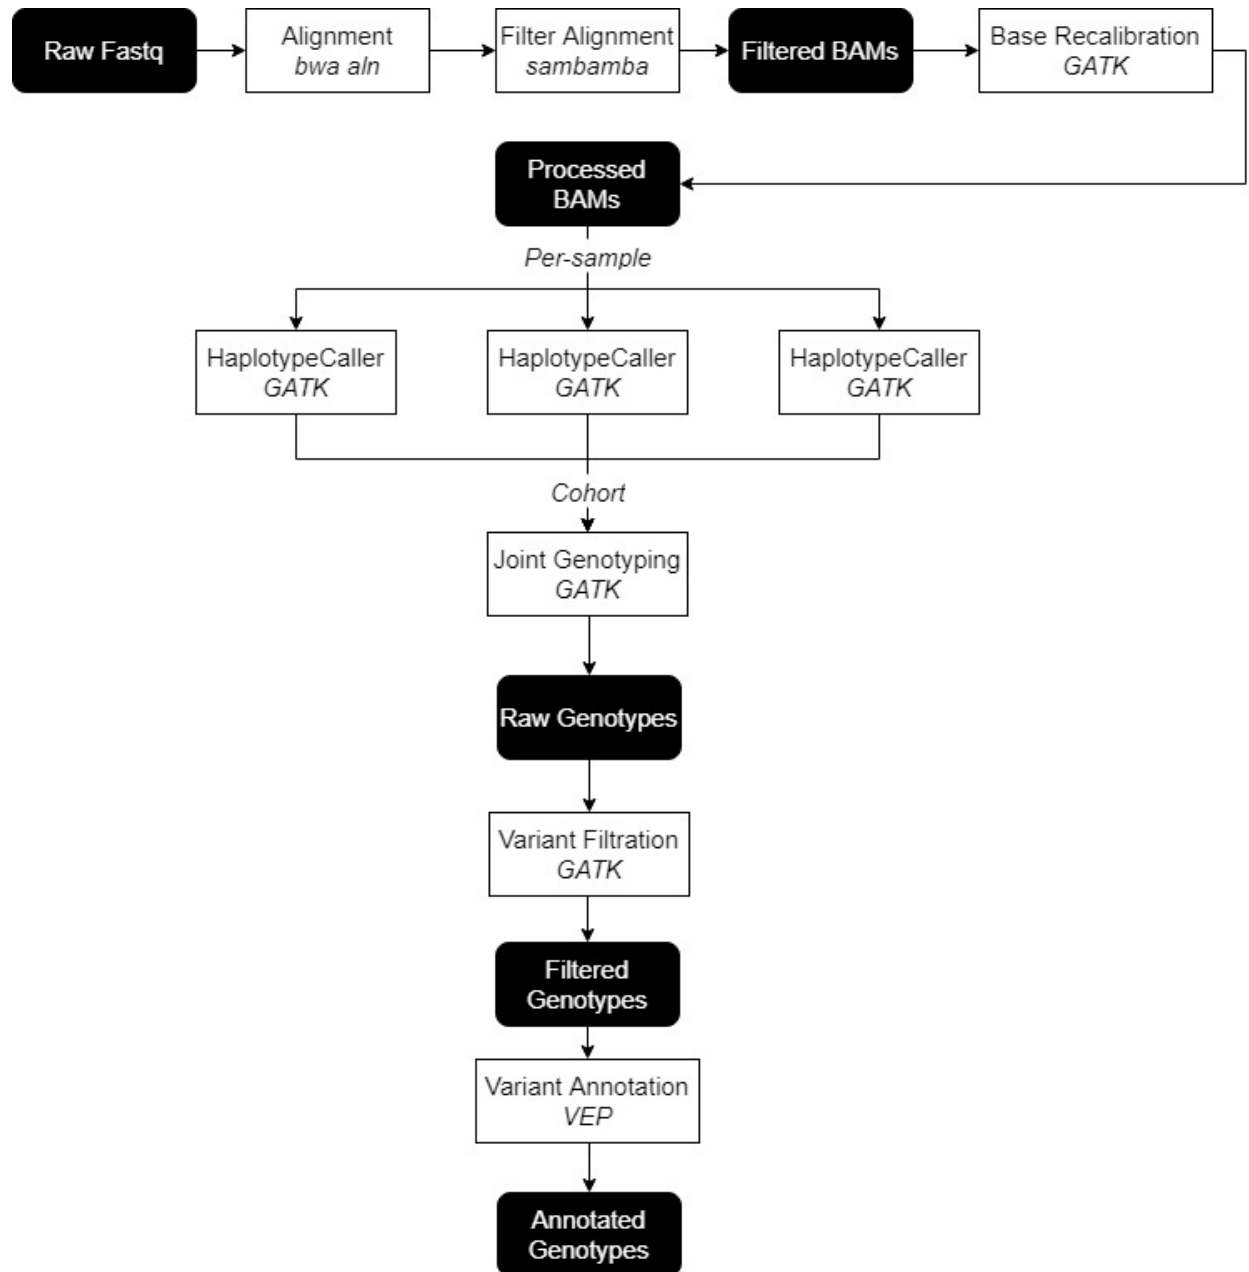

Figure S2

**A. MHC Class I L lineage genes on zebrafish chromosome 25.**

Unlike the CG2 fish, the CG1 and AB3 zebrafish genomes have a cluster of ZCRs (no coverage of aligned reads over 2kb) overlapping several Class I genes in a region ~150 kb surrounding *mhc1la*. In contrast to the CG1 and AB3 fish, Discover assembly scaffolds for the CG2 genome align to this region and their sequences have high percent identity to the reference genome. ZCRs were frequently found associated with MHC genes, including other MHC genes not found in this large cluster of MHC genes on chromosome 25. Read coverage is depicted in green, zero coverage regions (ZCRs) in red, NLR genes annotated by Howe et al. (2016) in purple, and scaffolds from the Discover assemblies aligned to the reference genome in grey.

**B. NLR gene cluster on zebrafish chromosome 1.**

The CG1 zebrafish genome has a high density of ZCRs (no coverage of aligned reads over 2kb) in this region. In contrast to the CG1 fish, Discover assembly scaffolds for the CG2 and AB3 genomes align to this region and their sequences have high percent identity to the reference genome. Read coverage for AB3 was lower, consistent with this fish being heterozygous for reference sequence. ZCRs were frequently found associated with NLR genes on several additional chromosomes outside of the large cluster tiled across one arm of zebrafish chromosome 4.

**A**

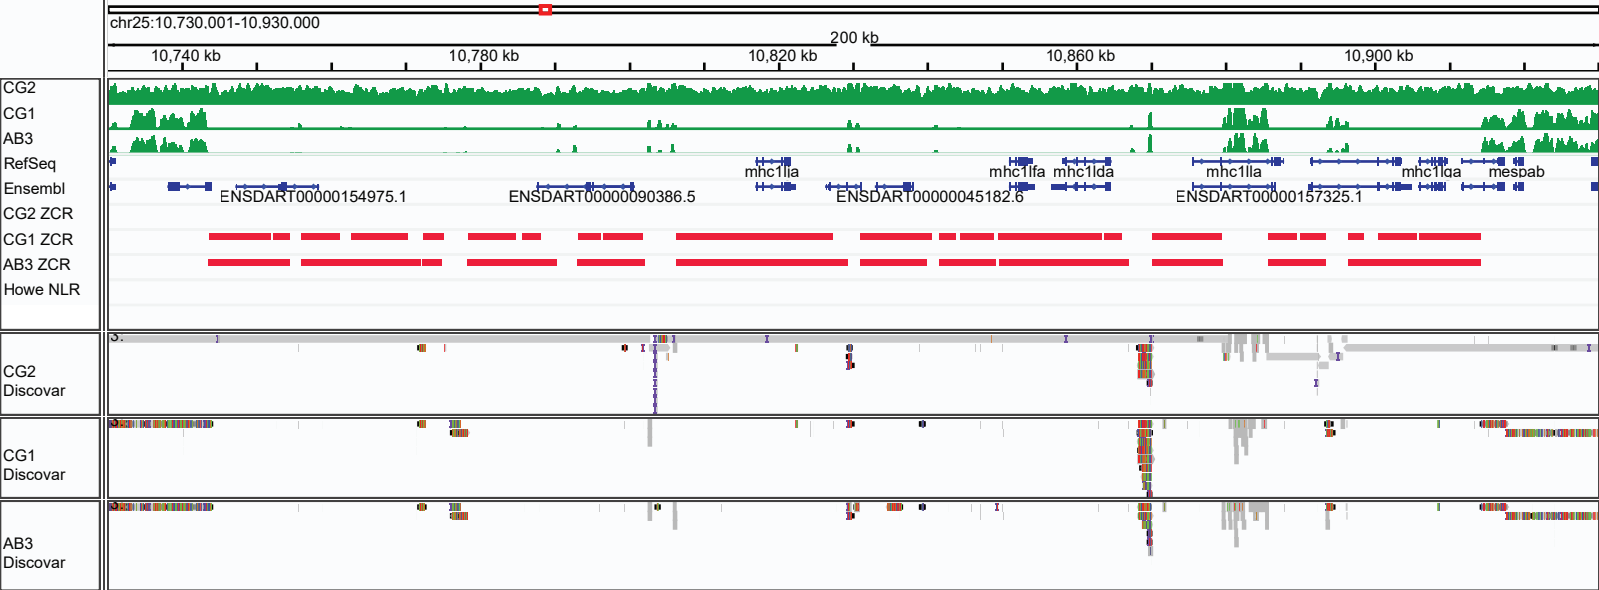

**B**

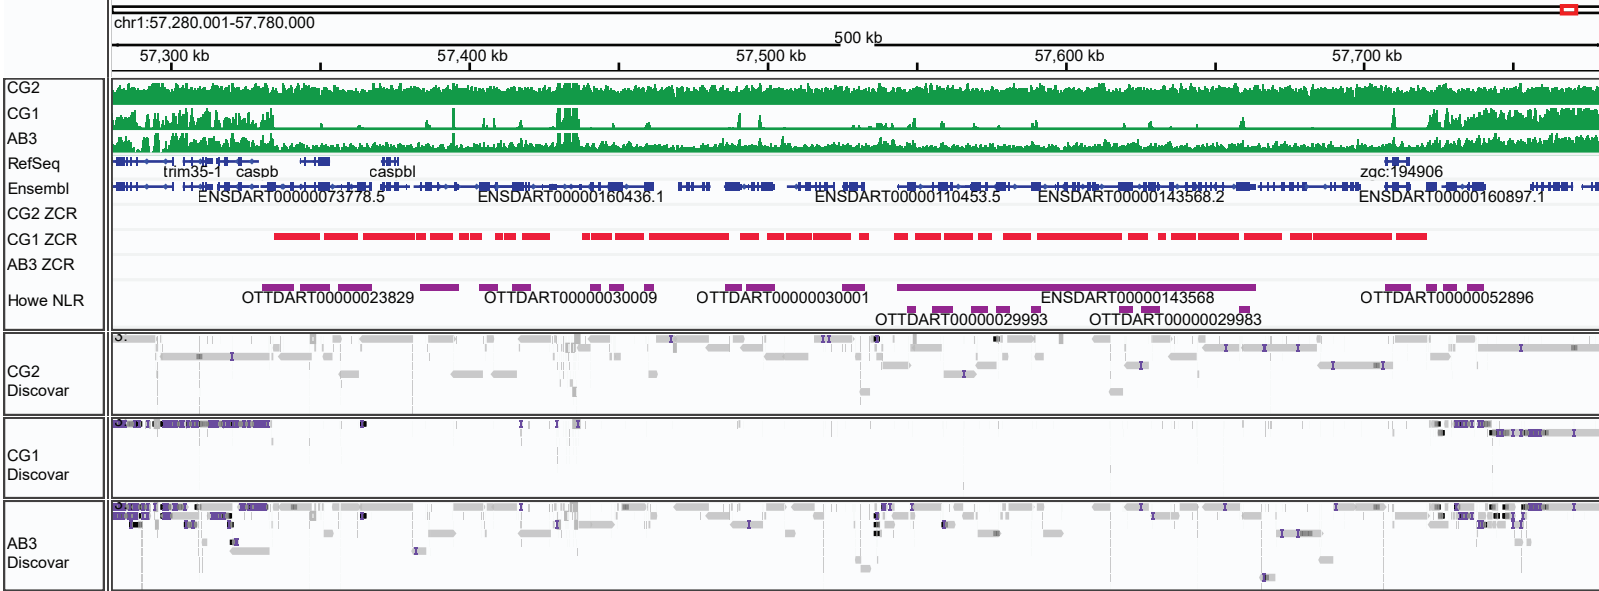

**Table S1**

**List of filters applied to zebrafish raw variants to enrich for higher confidence variants, applied at the locus level.**

| <b>Type</b> | <b>Filter</b>     | <b>Description</b>     | <b>Type</b> |
|-------------|-------------------|------------------------|-------------|
| SNP         | LowQD             | QD < 2.0               | locus       |
| SNP         | LowMQ             | MQ < 40.0              | locus       |
| SNP         | StrandBias        | FS > 60.0              | locus       |
| SNP         | HighSOR           | SOR > 4.0              | locus       |
| SNP         | LowMQRankSum      | MQRankSum < -12.5      | locus       |
| SNP         | LowReadPosRankSum | ReadPosRankSum < -8.0  | locus       |
| <b>Type</b> | <b>Filter</b>     | <b>Description</b>     | <b>Type</b> |
| INDEL       | LowQD             | QD < 2.0               | locus       |
| INDEL       | StrandBias        | FS > 200.0             | locus       |
| INDEL       | HighSOR           | SOR > 1.0              | locus       |
| INDEL       | LowReadPosRankSum | ReadPosRankSum < -20.0 | locus       |

**Table S2**

**Number of known (Ensembl dbSNP 142), novel, and combined (all) variants remaining per genome, after filtering for higher confidence variants.**

CHM, CEU, and YRI are samples from the 1000 genomes project. CHM is a haploid complete hydatidiform mole, CHM1. CEU is a Utah resident (CEPH) with European Ancestry (NA12878). YRI is person of the Yoruba community in Ibadan, Nigeria, (19240). CG2 and CG1 are clonal zebrafish lines, and AB3 is a partially inbred zebrafish, all on the AB genetic background.

| <b>Sample</b> | <b>Set</b> | <b>SNVs (n)</b> | <b>Insertions (n)</b> | <b>Deletions (n)</b> | <b>Insertion/<br/>Deletion ratio</b> |
|---------------|------------|-----------------|-----------------------|----------------------|--------------------------------------|
| CG2           | known      | 4005069         | 5596                  | 303765               | 0.02                                 |
| CG1           | known      | 3935546         | 3714                  | 265239               | 0.01                                 |
| AB3           | known      | 4065092         | 3998                  | 265892               | 0.02                                 |
| CG2           | novel      | 2633746 (39.7%) | 930670 (99.4%)        | 656462 (68.4%)       | 1.42                                 |
| CG1           | novel      | 2384250 (37.7%) | 693058 (99.5%)        | 465989 (63.7%)       | 1.49                                 |
| AB3           | novel      | 2929636 (41.9%) | 748935 (99.5%)        | 529171 (66.6%)       | 1.42                                 |
| CG2           | all        | 6638815         | 936266                | 960227               | 0.98                                 |
| CG1           | all        | 6319796         | 696772                | 731228               | 0.95                                 |
| AB3           | all        | 6994728         | 752933                | 795063               | 0.95                                 |
| <b>Sample</b> | <b>Set</b> | <b>SNVs (n)</b> | <b>Insertions (n)</b> | <b>Deletion (n)</b>  | <b>Insertion/<br/>Deletion</b>       |
| CHM1          | known      | 2447054         | 235762                | 276605               | 0.85                                 |
| CEU           | known      | 3377708         | 268821                | 304765               | 0.88                                 |
| YRI           | known      | 4181956         | 279183                | 324387               | 0.86                                 |
| CHM1          | novel      | 47250 (1.89%)   | 54352 (18.7%)         | 58678 (17.5%)        | 0.93                                 |
| CEU           | novel      | 17381 (0.51%)   | 57333 (17.6%)         | 58086 (16.0%)        | 0.99                                 |
| YRI           | novel      | 31477 (0.75%)   | 59151 (17.5%)         | 85477 (20.9%)        | 0.69                                 |
| CHM1          | all        | 2494304         | 290114                | 335283               | 0.87                                 |
| CEU           | all        | 3395089         | 326154                | 362851               | 0.9                                  |
| YRI           | all        | 4213433         | 338334                | 409864               | 0.83                                 |

**Table S3**

**Ratios of heterozygous (Het.) to homozygous (Hom.) variants for known (Ensembl dbSNP 142), novel, and combined (all) variants remaining per genome, after filtering for higher confidence variants.**

| <b>Sample</b> | <b>Set</b> | <b>SNP Het./H0om. ratio</b> | <b>Insertion Het./Hom. ratio</b> | <b>Deletion Het./Hom. ratio</b> |
|---------------|------------|-----------------------------|----------------------------------|---------------------------------|
| CG2           | known      | 0.01 (42649 /3962420)       | 0.01 (60 /5536)                  | 0.01 (2921 /300844)             |
| CG1           | known      | 0.01 (39278 /3896268)       | 0.02 (74 /3640)                  | 0.01 (2867 /262372)             |
| AB3           | known      | 1.05 (2078827 /1986265)     | 0.90 (1894 /2104)                | 0.88 (124662 /141230)           |
| CG2           | novel      | 0.08 (189220 /2444526)      | 0.03 (30033 /900637)             | 0.06 (34491 /621971)            |
| CG1           | novel      | 0.07 (160228 /2224022)      | 0.04 (23733 /669325)             | 0.06 (25970 /440019)            |
| AB3           | novel      | 1.75 (1864812 /1064824)     | 1.04 (382405 /366530)            | 1.18 (286181 /242990)           |
| CG2           | all        | 0.04 (231869 /6406946)      | 0.03 (30093 /906173)             | 0.04 (37412 /922815)            |
| CG1           | all        | 0.03 (199506 /6120290)      | 0.04 (23807 /672965)             | 0.04 (28837 /702391)            |
| AB3           | all        | 1.29 (3943639 /3051089)     | 1.04 (384299 /368634)            | 1.07 (410843 /384220)           |
| <b>Sample</b> | <b>Set</b> | <b>SNP Het./Hom. ratio</b>  | <b>Insertion Het./Hom. ratio</b> | <b>Deletion Het./Hom. ratio</b> |
| CHM1          | known      | 0.01 (19743 /2427311)       | 0.05 (10327 /225435)             | 0.05 (13640 /262965)            |
| CEU           | known      | 1.52 (2036311 /1341397)     | 1.17 (144880 /123941)            | 1.39 (177232 /127533)           |
| YRI           | known      | 1.94 (2760962 /1420994)     | 1.49 (166901 /112282)            | 1.78 (207559 /116828)           |
| CHM1          | novel      | 0.55 (16757 /30493)         | 0.13 (6227 /48125)               | 0.24 (11532 /47146)             |
| CEU           | novel      | 5.07 (14517 /2864)          | 2.12 (38937 /18396)              | 2.98 (43478 /14608)             |
| YRI           | novel      | 6.25 (27136 /4341)          | 3.81 (46854 /12297)              | 5.11 (71478 /13999)             |
| CHM1          | all        | 0.01 (36500 /2457804)       | 0.06 (16554 /273560)             | 0.08 (25172 /310111)            |
| CEU           | all        | 1.53 (2050828 /1344261)     | 1.29 (183817 /142337)            | 1.55 (220710 /142141)           |
| YRI           | all        | 1.96 (2788098 /1425335)     | 1.72 (213755 /124579)            | 2.13 (279037 /130827)           |

**Table S5**

**BUSCO analysis of genomic assemblies.** GRCz10 represents a chromosome-level assembly for the zebrafish reference genome. Analysis was restricted to scaffolds at least 1kb in size. To improve performance, BUSCO was customized by independent tblastn. The numbers of Complete genes (Complete single-copy or Complete duplicated; C), Fragmented genes (Frag.; F), and Missing genes (M) are shown, along with their percentages. The total number of genes analyzed was 3023.

| Sample    | Assembly        | Complete | Complete single-copy | Complete and duplicated | Frag. | Missing | BUSCO benchmark              |
|-----------|-----------------|----------|----------------------|-------------------------|-------|---------|------------------------------|
| Tuebingen | GRCz10 (chr.)   | 2589     | 2464                 | 125                     | 251   | 183     | C:85%[D:4.1%],F:8.3%, M:6.0% |
| CG2       | SOAP (v1.0)     | 2594     | 2480                 | 114                     | 238   | 191     | C:85%[D:3.7%],F:7.8%, M:6.3% |
| CG2       | Discover (v2.0) | 2603     | 2485                 | 118                     | 239   | 181     | C:86%[D:3.9%],F:7.9%, M:5.9% |
| CG1       | Discover (v2.0) | 2618     | 2504                 | 114                     | 237   | 168     | C:86%[D:3.7%],F:7.8%, M:5.5% |
| AB3       | Discover (v2.0) | 2368     | 2260                 | 108                     | 309   | 346     | C:78%[D:3.5%],F:10%, M:11%   |

**Table S6**

**Overview of assembly metrics.** GRCz10 represents a chromosome-level assembly for the zebrafish reference genome. For each assembly, the N50 was defined as the length of the shortest scaffold at 50% of total genome length. In contrast, the L50 count was defined as the smallest number of scaffolds whose length sum comprises half of the genome size. N's were not considered for the %GC calculation.

| Sample    | Assembly           | Length (bp)   | N50 (bp)   | L50 (#) | %GC   | Ns/100kb | Scaf. (#) |
|-----------|--------------------|---------------|------------|---------|-------|----------|-----------|
| CG2       | SOAP (v1.0)        | 1,228,709,066 | 34,289     | 9,949   | 36.15 | 5766.12  | 73,507    |
| CG2       | Discover (v2.0)    | 1,290,936,762 | 40,494     | 8,876   | 36.36 | 120.35   | 83,098    |
| CG1       | Discover (v2.0)    | 1,287,273,931 | 38,614     | 9,213   | 36.36 | 124.31   | 85,796    |
| AB3       | Discover (v2.0)    | 1,498,361,605 | 16,522     | 20,102  | 36.37 | 73.33    | 202,659   |
| Tuebingen | GRCz10 (reference) | 1,340,447,187 | 54,191,831 | 11      | 36.62 | 137.39   | 3,399     |



**Table S7**

**Genomic scaffolds associated with zebrafish chromosome 8.** Scaffolds were identified using BLAST searches for Discover assemblies from the CG2, CG1, the AB3 individual zebrafish genomes.

| Haplotype                          | GRCz10                     | CG1                  | CG2                  | AB3                  |
|------------------------------------|----------------------------|----------------------|----------------------|----------------------|
| <i>mhc2dab</i> ,<br><i>mhc2daa</i> | <a href="#">CU694380.6</a> | flattened_line_39082 | flattened_line_39346 | NA                   |
| <i>mhc2dgb</i> ,<br><i>mhc2dga</i> | <a href="#">CU929676.6</a> | NA                   | NA                   | flattened_line_40646 |

**Table S8**

**Nomenclature and expression for zebrafish MHC class II genes.** Expression data was adapted from 'Sequencing the Zebrafish transcriptome from a range of tissues and developmental stages' (<https://www.ncbi.nlm.nih.gov/bioproject/PRJEB1986/>). Expression is shown in Reads Per Kilobase of transcript, per Million mapped reads (RPKM). 'Mean RPKM' provides a rough estimate and comparison of expression levels from a female zebrafish head.

| Full name | Short name | Historical Name    | Chr. | Mean RPKM               | Refseq ID      | ZFIN ID              | Ensembl Gene      |
|-----------|------------|--------------------|------|-------------------------|----------------|----------------------|-------------------|
| mhc2daa   | daa        | si:busm1-266f07.2  | 8    | <a href="#">148.263</a> | NP_001004521.3 | ZDB-GENE-030616-436  | ENSDARG0000031745 |
| mhc2dab   | dab        | si:dkeyp-2h4.1     | 8    | <a href="#">231.094</a> | NP_571551.3    | ZDB-GENE-980526-200  | ENSDARG0000079105 |
| mhc2dga   | dga        | si:busm1-194e12.11 | 8    | <a href="#">89.689</a>  | NP_001007206.1 | ZDB-GENE-030616-505  | ENSDARG0000103716 |
| mhc2dgb   | dgb        | si:busm1-194e12.12 | 8    | <a href="#">86.839</a>  | NP_001005943.3 | ZDB-GENE-030616-319  | ENSDARG0000104635 |
| mhc2dba   | dba        | si:busm1-241h12.2p | 18   | <a href="#">1.257</a>   | XR_001796469.2 | ZDB-GENEP-030616-407 | ENSDARG0000093885 |
| mhc2dbb   | dbb        | si:busm1-241h12.1  | 18   | <a href="#">2.536</a>   | NP_001070245.1 | ZDB-GENE-010112-2    | ENSDARG0000056330 |
| mhc2dca   | dca        | zmp:0000000884     | 8    | <a href="#">0.841</a>   | XP_009302501.2 | ZDB-GENE-130530-887  | ENSDARG0000114601 |
| mhc2dcb   | dcb        | si:busm1-228j01.4  | 8    | <a href="#">0.158</a>   | NP_001009597.1 | ZDB-GENE-030616-394  | ENSDARG0000088872 |

**Table S9****Zebrafish and Human MHC genes, and Human NLR genes**

Major Histocompatibility Complex (MHC) and NOD-like receptor (NLR) gene lists were compiled from annotated gene lists for each species, and used to identify exon overlap with ZCRs, based on canonical Ensembl gene models. 'Dr' refers to zebrafish (*Danio rerio*), and 'Hs' refers to human (*Homo sapiens*). The zebrafish NLR gene set was based on published reference genome annotation efforts (Howe et al. 2016) for genes remaining in Ensembl v85.

| Species | Gene set | Ensembl identifier  | Gene name          |
|---------|----------|---------------------|--------------------|
| Dr      | MHC      | ENSDARG00000001470  | mhc1zea            |
| Dr      | MHC      | ENSDARG000000069471 | mhc1zca            |
| Dr      | MHC      | ENSDARG000000036588 | mhc1zba            |
| Dr      | MHC      | ENSDARG000000088022 | mhc1zfa            |
| Dr      | MHC      | ENSDARG000000092162 | mhc1zaa            |
| Dr      | MHC      | ENSDARG000000074765 | mhc1zja            |
| Dr      | MHC      | ENSDARG000000055813 | si:dkey-225f5.5    |
| Dr      | MHC      | ENSDARG000000016056 | mhc1laa            |
| Dr      | MHC      | ENSDARG000000016227 | CU571323.1         |
| Dr      | MHC      | ENSDARG000000092731 | mhc1uka            |
| Dr      | MHC      | ENSDARG000000075963 | mhc1uba            |
| Dr      | MHC      | ENSDARG000000039164 | mhc1uma            |
| Dr      | MHC      | ENSDARG000000059039 | mhc1ula            |
| Dr      | MHC      | ENSDARG000000097275 | si:ch211-147g22.4  |
| Dr      | MHC      | ENSDARG000000051710 | CR339041.1         |
| Dr      | MHC      | ENSDARG000000096830 | mhc1lja            |
| Dr      | MHC      | ENSDARG000000051711 | CR339041.2         |
| Dr      | MHC      | ENSDARG000000051712 | mhc1lfa            |
| Dr      | MHC      | ENSDARG000000023203 | mhc1lda            |
| Dr      | MHC      | ENSDARG000000096977 | mhc1lla            |
| Dr      | MHC      | ENSDARG000000096940 | arpc1a             |
| Dr      | MHC      | ENSDARG000000051713 | mhc1lga            |
| Dr      | MHC      | ENSDARG000000097766 | mhc1lia            |
| Dr      | MHC      | ENSDARG000000104293 | mhc1zka            |
| Dr      | MHC      | ENSDARG000000101337 | zgc:103700         |
| Dr      | MHC      | ENSDARG000000074510 | si:busm1-104n07.3  |
| Dr      | MHC      | ENSDARG000000104635 | si:busm1-194e12.12 |
| Dr      | MHC      | ENSDARG000000076307 | si:zf0s-2070c2.3   |
| Dr      | MHC      | ENSDARG000000104730 | si:dkey-33b17.3    |
| Dr      | MHC      | ENSDARG000000101030 | si:ch73-158p21.3   |
| Dr      | MHC      | ENSDARG000000041705 | si:busm1-228j01.6  |

|    |     |                    |                   |
|----|-----|--------------------|-------------------|
| Dr | MHC | ENSDARG00000056330 | mhc2dbb           |
| Dr | MHC | ENSDARG00000088872 | si:busm1-228j01.4 |
| Dr | MHC | ENSDARG00000104317 | si:busm1-160c18.1 |
| Dr | MHC | ENSDARG00000086294 | CU914776.1        |
| Dr | MHC | ENSDARG00000031745 | si:busm1-266f07.2 |
| Dr | MHC | ENSDARG00000103716 | si:busm1-48c11.3  |
| Dr | MHC | ENSDARG00000075932 | si:ch73-211l2.3   |
| Dr | MHC | ENSDARG00000074816 | si:zfos-367g9.1   |
| Dr | MHC | ENSDARG00000070206 | si:zfos-2070c2.1  |
| Dr | MHC | ENSDARG00000101675 | zgc:123107        |
| Dr | MHC | ENSDARG00000103702 | si:busm1-194e12.8 |
| Hs | MHC | ENSG00000160862    | AZGP1             |
| Hs | MHC | ENSG00000166710    | B2M               |
| Hs | MHC | ENSG00000158477    | CD1A              |
| Hs | MHC | ENSG00000158485    | CD1B              |
| Hs | MHC | ENSG00000158481    | CD1C              |
| Hs | MHC | ENSG00000158473    | CD1D              |
| Hs | MHC | ENSG00000158488    | CD1E              |
| Hs | MHC | ENSG00000104870    | FCGRT             |
| Hs | MHC | ENSG00000010704    | HFE               |
| Hs | MHC | ENSG00000206503    | HLA-A             |
| Hs | MHC | ENSG00000234745    | HLA-B             |
| Hs | MHC | ENSG00000204525    | HLA-C             |
| Hs | MHC | ENSG00000204257    | HLA-DMA           |
| Hs | MHC | ENSG00000242574    | HLA-DMB           |
| Hs | MHC | ENSG00000204252    | HLA-DOA           |
| Hs | MHC | ENSG00000241106    | HLA-DOB           |
| Hs | MHC | ENSG00000231389    | HLA-DPA1          |
| Hs | MHC | ENSG00000223865    | HLA-DPB1          |
| Hs | MHC | ENSG00000196735    | HLA-DQA1          |
| Hs | MHC | ENSG00000237541    | HLA-DQA2          |
| Hs | MHC | ENSG00000179344    | HLA-DQB1          |
| Hs | MHC | ENSG00000232629    | HLA-DQB2          |
| Hs | MHC | ENSG00000204287    | HLA-DRA           |
| Hs | MHC | ENSG00000196126    | HLA-DRB1          |
| Hs | MHC | ENSG00000198502    | HLA-DRB5          |
| Hs | MHC | ENSG00000204592    | HLA-E             |
| Hs | MHC | ENSG00000204642    | HLA-F             |
| Hs | MHC | ENSG00000204632    | HLA-G             |
| Hs | MHC | ENSG00000204520    | MICA              |

|    |     |                 |         |
|----|-----|-----------------|---------|
| Hs | MHC | ENSG00000204516 | MICB    |
| Hs | MHC | ENSG00000153029 | MR1     |
| Hs | MHC | ENSG00000164520 | RAET1E  |
| Hs | MHC | ENSG00000203722 | RAET1G  |
| Hs | MHC | ENSG00000155918 | RAET1L  |
| Hs | MHC | ENSG00000111981 | ULBP1   |
| Hs | MHC | ENSG00000131015 | ULBP2   |
| Hs | MHC | ENSG00000131019 | ULBP3   |
| Hs | NLR | ENSG00000179583 | CIITA   |
| Hs | NLR | ENSG00000249437 | NAIP    |
| Hs | NLR | ENSG00000167984 | NLRC3   |
| Hs | NLR | ENSG00000091106 | NLRC4   |
| Hs | NLR | ENSG00000140853 | NLRC5   |
| Hs | NLR | ENSG00000091592 | NLRP1   |
| Hs | NLR | ENSG00000022556 | NLRP2   |
| Hs | NLR | ENSG00000215174 | NLRP2B  |
| Hs | NLR | ENSG00000162711 | NLRP3   |
| Hs | NLR | ENSG00000277883 | NLRP3P1 |
| Hs | NLR | ENSG00000160505 | NLRP4   |
| Hs | NLR | ENSG00000171487 | NLRP5   |
| Hs | NLR | ENSG00000174885 | NLRP6   |
| Hs | NLR | ENSG00000167634 | NLRP7   |
| Hs | NLR | ENSG00000179709 | NLRP8   |
| Hs | NLR | ENSG00000185792 | NLRP9   |
| Hs | NLR | ENSG00000256581 | NLRP9P1 |
| Hs | NLR | ENSG00000182261 | NLRP10  |
| Hs | NLR | ENSG00000179873 | NLRP11  |
| Hs | NLR | ENSG00000142405 | NLRP12  |
| Hs | NLR | ENSG00000173572 | NLRP13  |
| Hs | NLR | ENSG00000158077 | NLRP14  |
| Hs | NLR | ENSG00000160703 | NLRX1   |
| Hs | NLR | ENSG00000106100 | NOD1    |
| Hs | NLR | ENSG00000167207 | NOD2    |

\*Howe K, Schiffer PH, Zielinski J, Wiehe T, Laird GK, Marioni JC, Soylemez O, Kondrashov F, Leptin M. 2016. Structure and evolutionary history of a large family of NLR proteins in the zebrafish. *Open Biol* **6**: 160009.

**Table S10: Summary of ZCR regions and number of genes found overlapping with ZCRs for the zebrafish and human genomes.**

| <b>Sample</b> | <b>Total Regions</b> | <b>Median Size (bp)</b> | <b>Max Size (bp)</b> | <b>Total length (GB)</b> | <b>Genome (%)</b> | <b>Genes with <math>\geq 1</math> exon in ZCR</b> |
|---------------|----------------------|-------------------------|----------------------|--------------------------|-------------------|---------------------------------------------------|
| CHM           | 236                  | 3325                    | 36450                | 1.08                     | 0.04              | 15                                                |
| CEU           | 163                  | 3050                    | 11200                | 0.57                     | 0.02              | 12                                                |
| YRI           | 79                   | 2800                    | 9150                 | 0.26                     | 0.01              | 8                                                 |
| CG2           | 3784                 | 2850                    | 20900                | 13.35                    | 1                 | 632                                               |
| CG1           | 6214                 | 2850                    | 49200                | 24.5                     | 1.83              | 1081                                              |
| AB3           | 3219                 | 2900                    | 49950                | 13.38                    | 1                 | 538                                               |
